# Supplementary material for: Focal Unspecific Bone Uptake on [18F]-psma-1007 Pet: A Multicenter Retrospective Evaluation of the Distribution, Frequency, and Quantitative Parameters of a Potential Pitfall in Prostate Cancer Imaging
Source: Research Square preprint supplement (doi:10.21203/rs.3.rs-339857/v1), 2021-03-24
Supplement: Supplementary file 1 [file d8f576da314477689a18e5a6.docx]

**Supplemental Figures**


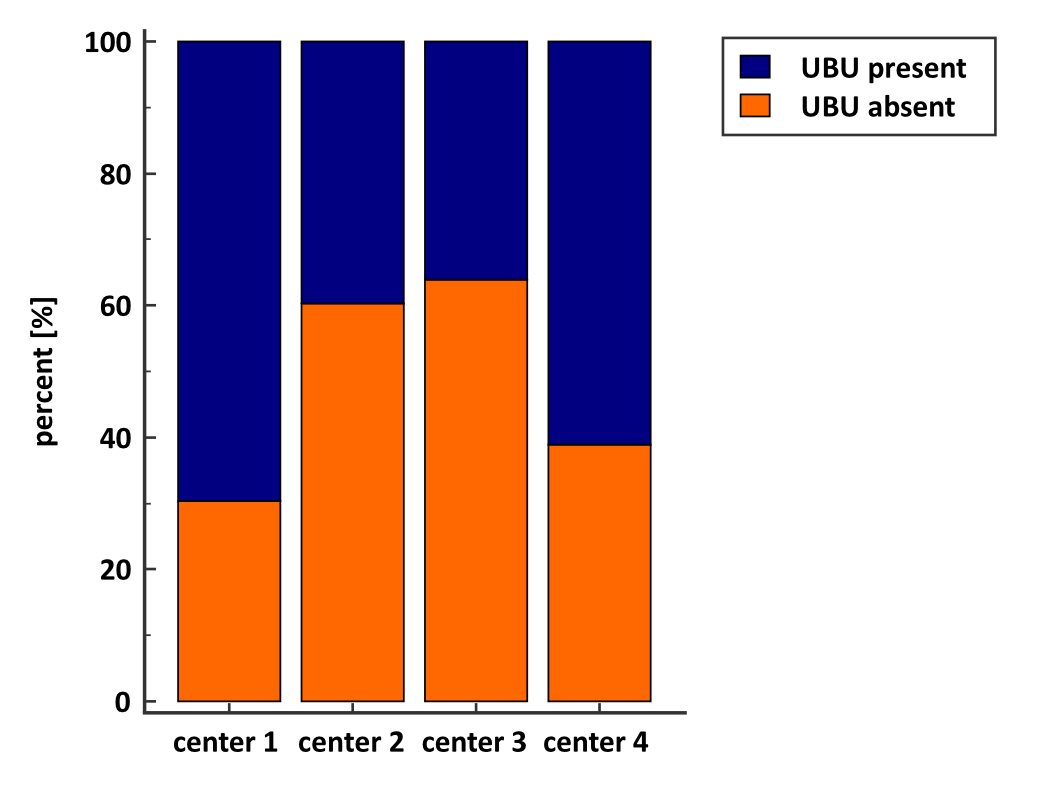


**Supplement 1:** Bar charts with percentage distributions of the frequencies of UBUs at each center.


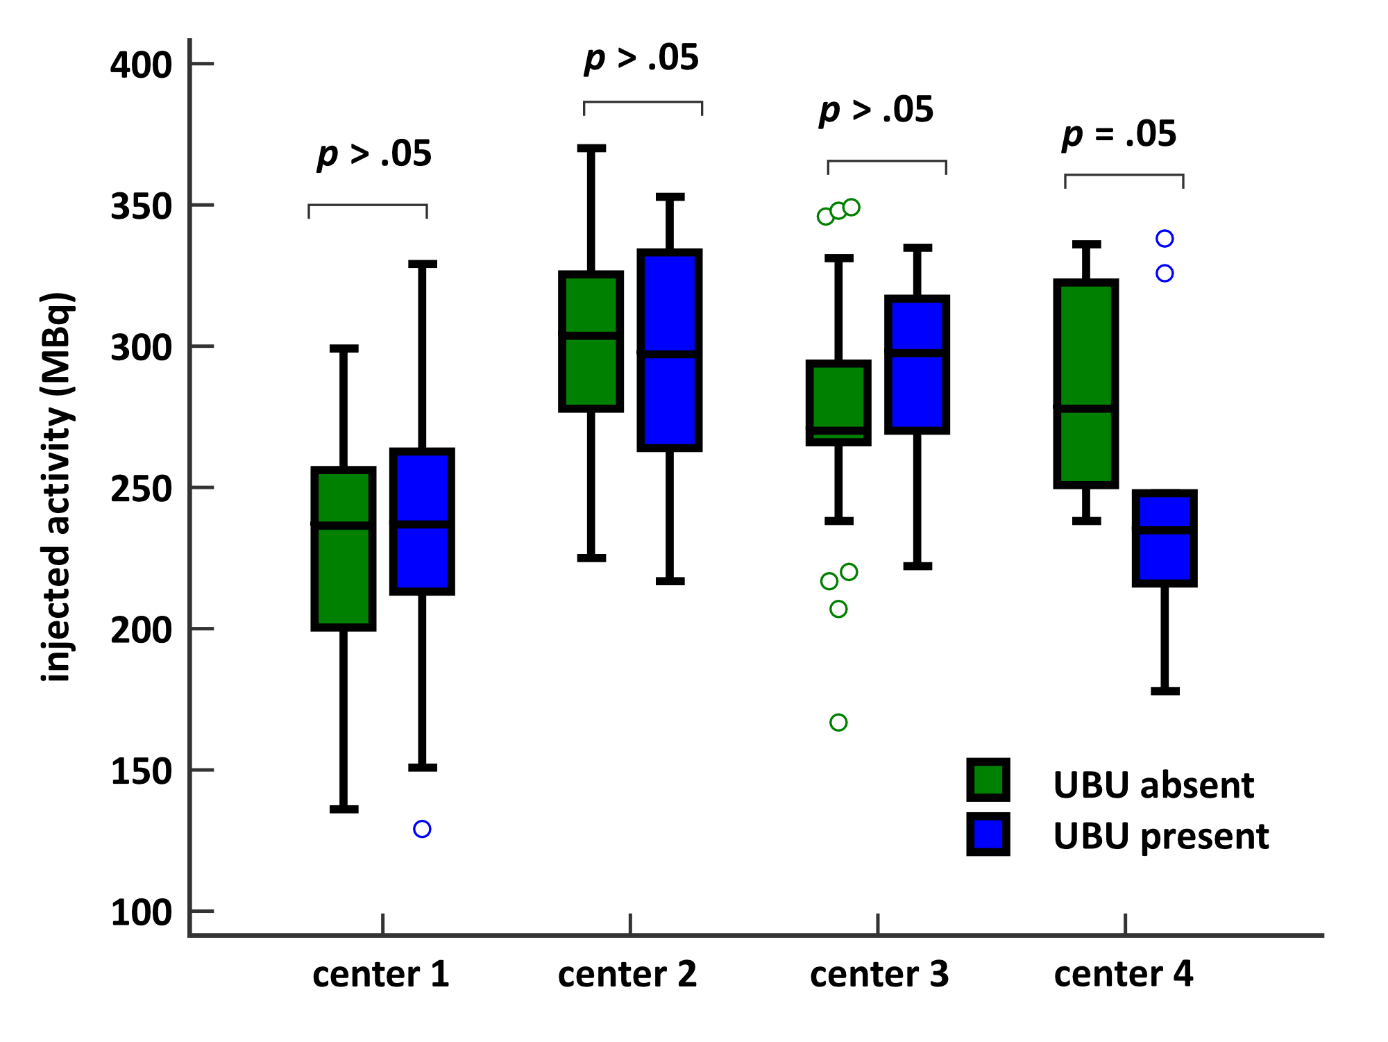


**Supplement 2:** Box–whisker plots show no significant association between injection activity and the frequency of UBUs at each center.
